# Supplementary material for: Quantitative network mapping of the human kinome interactome reveals new clues for rational kinase inhibitor discovery and individualized cancer therapy
Source: PubMed Central journal article supplement (PMC4116514; doi:10.18632/oncotarget.1984), 2014-05-18
Supplement: oncotarget-05-3697-s005.pdf [file oncotarget-05-3697-s005.pdf]

# Quantitative network mapping of the human kinome interactome reveals new clues for rational kinase inhibitor discovery and individualized cancer therapy

## Supplementary Material

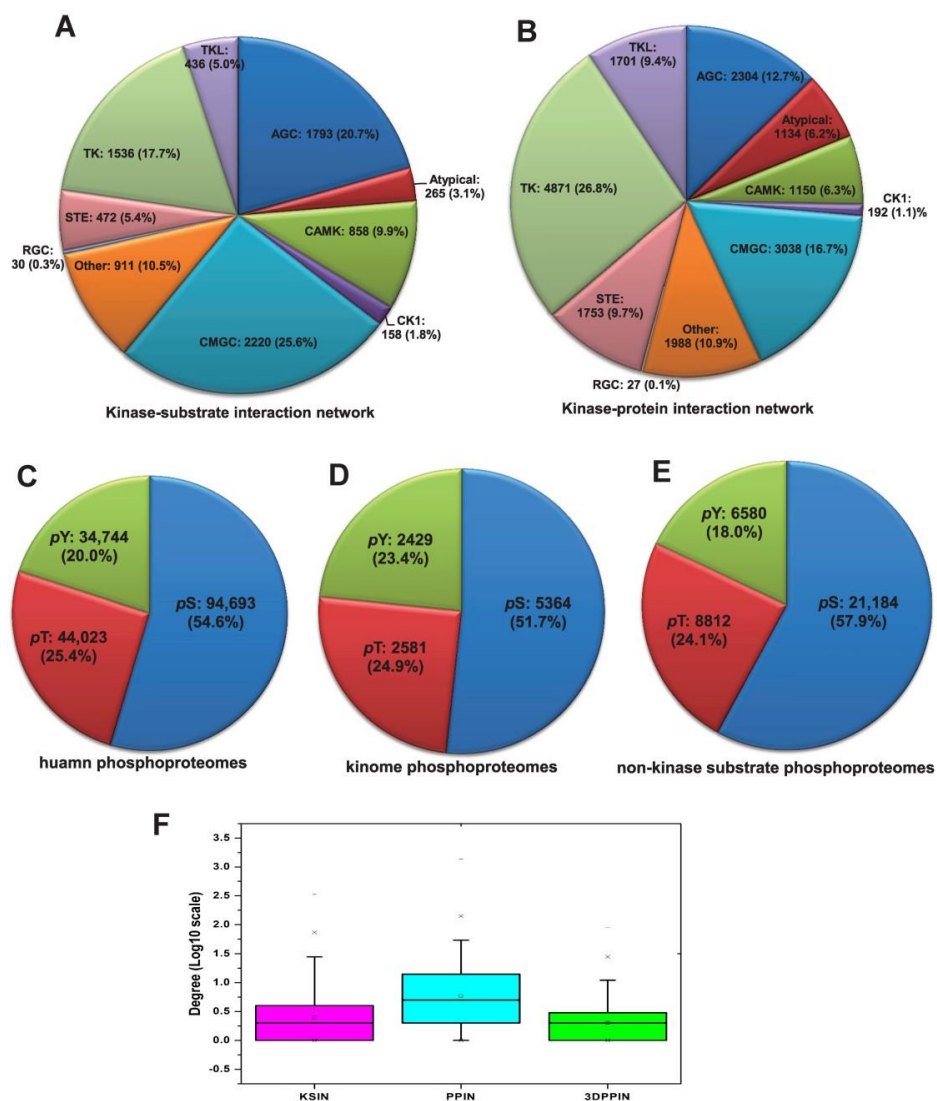

**Figure S1: The distribution of kinase-substrate interactions, kinase-protein interactions, phosphorylation sites, and protein connectivity in three networks. A and B:** The distribution of kinase-substrate interaction and kinase-protein interaction subnetwork grouped by 10 kinase groups. **C, D and E:** The distribution of phosphorylation sites (Threonine, Tyrosine and Serine) for the human phosphoproteomes (**C**, 18,610 proteins), kinome (**D**, 490 kinases) and non-kinase substrate proteins (**E**, 1,919 proteins). **F:** The blot plots of protein connectivity distribution in three networks: kinase-substrate interaction network (KSIN), protein-protein interaction network (PPIN), and three-dimensional structural protein-protein interaction network (3DPPIN). The detailed data are provided in Supplementary Table S1 and S2.

A

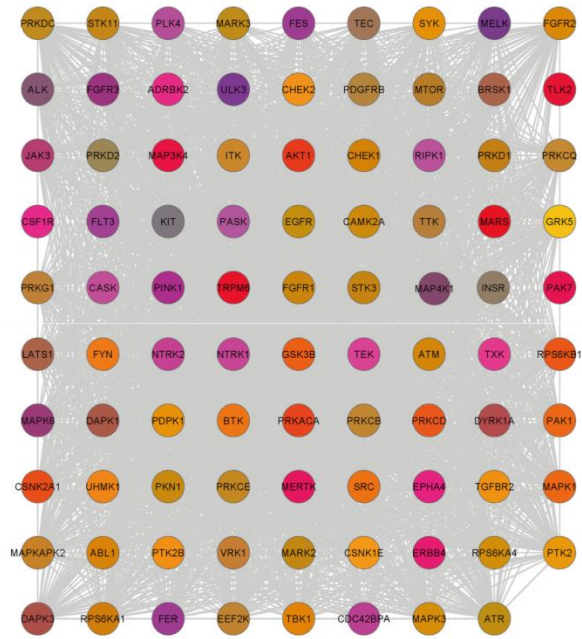

**B**

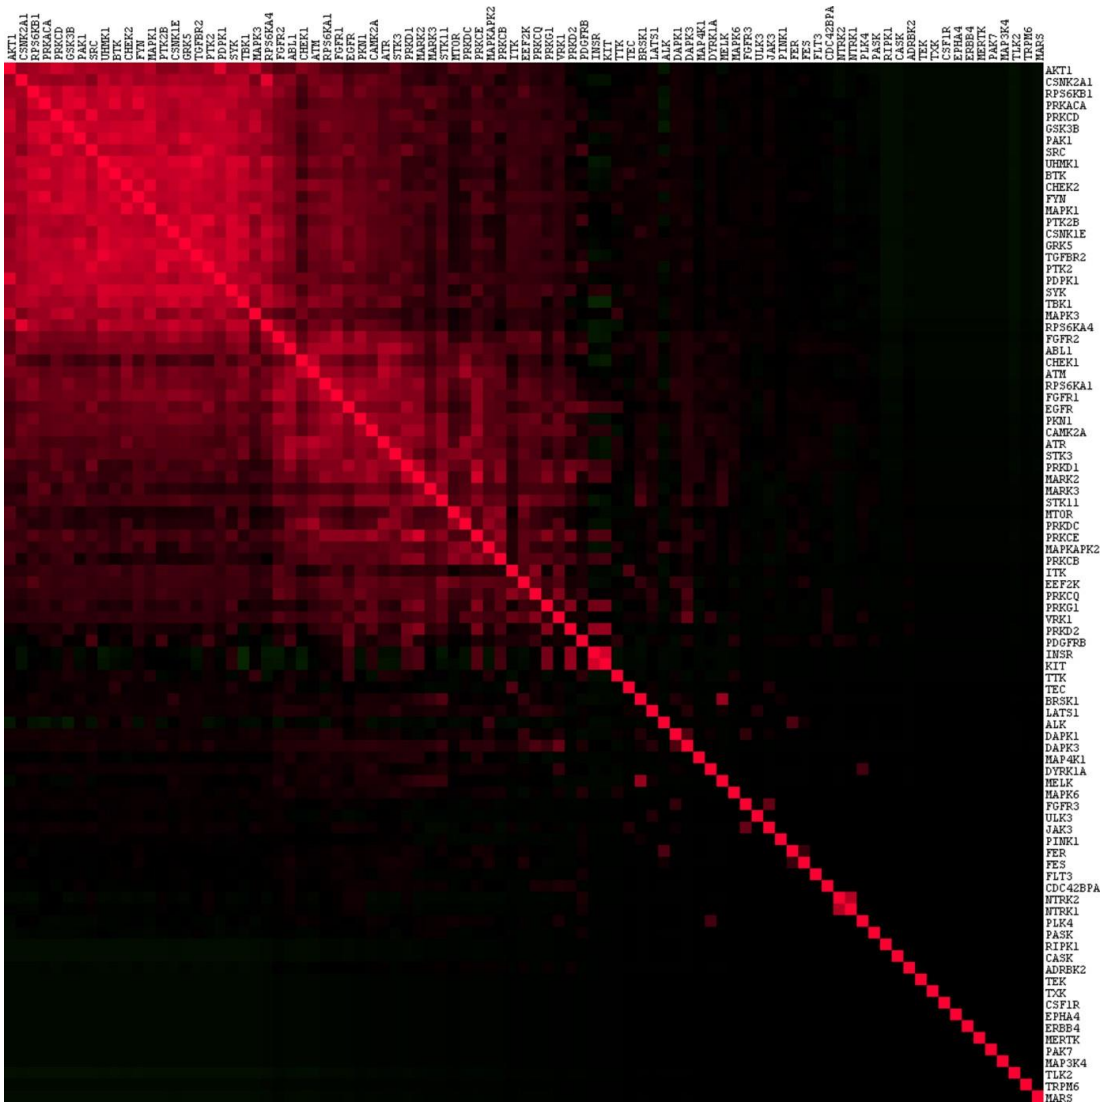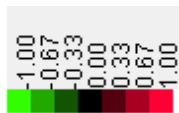

**Figure S2: The first-level network module of the kinase-substrate interaction network (KSIN) and heat map of module correlation (similarity) matrices identified by the ModuLand algorithm [1, 2]. (A) The first-level network module of the KSIN. Each of the meta-nodes represents a module, and its name identifies the module central node. (B) The heat map of module correlation (similarity) matrices. The high correlation denotes that two modules are similar.**

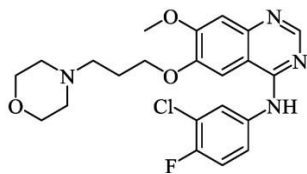

Gefitinib (DB00317)  
Target: EGFR  
Clinical use: NSCLC

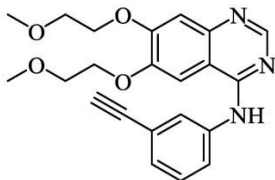

Erlotinib (DB00530)  
Target: EGFR  
Clinical use: NSCLC

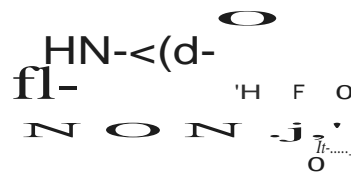

Lapatinib (DB01259)  
Target: EGFR, ERBB2  
Clinical use: BC

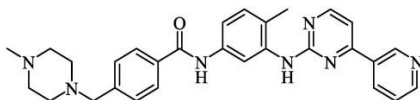

Imatinib (DB00619)  
Target: ABL, KIT, PDGFR  
clinical use: CML, GIST

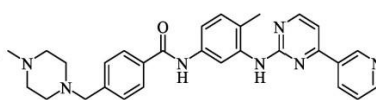

Dasatinib (DB01254)  
Target: ABL, SRC, KIT, PDGFR  
Clinical use: CML

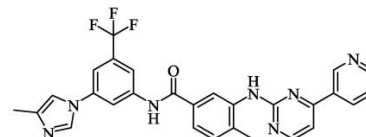

Nilotinib (DB04868)  
Target: ABL  
Clinical use: CML

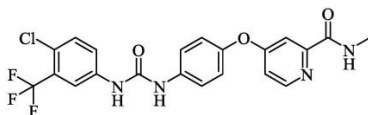

Sorafenib (DB00398)  
Target: RAF, PDGF  
Clinical use: RCC

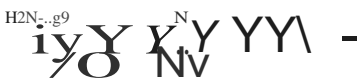

Pazopanib (DB06589)  
Target: VEGFR, PDGFRA,  
PDGFRB, KIT  
Clinical use: RCC

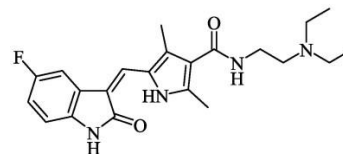

Sunitinib (DB01268)  
Target: PDGFRA, PDGFRB,  
FLT3, VEGFR(KDR), KIT,  
Clinical use: RCC, GIST

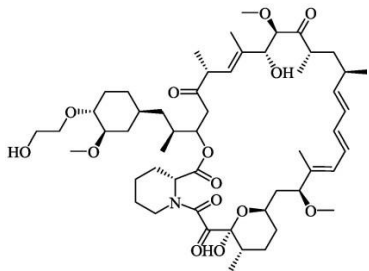

Everolimus (DB01590)  
Target: MTOR  
Clinical use: BC

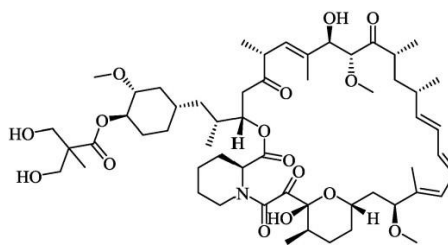

Temsirolimus (DB06287)  
Target: MTOR  
Clinical use: RCC

**Figure S3: The chemical structure, target proteins, and FDA approved clinical usages of 11 molecularly targeted kinase inhibitors.**

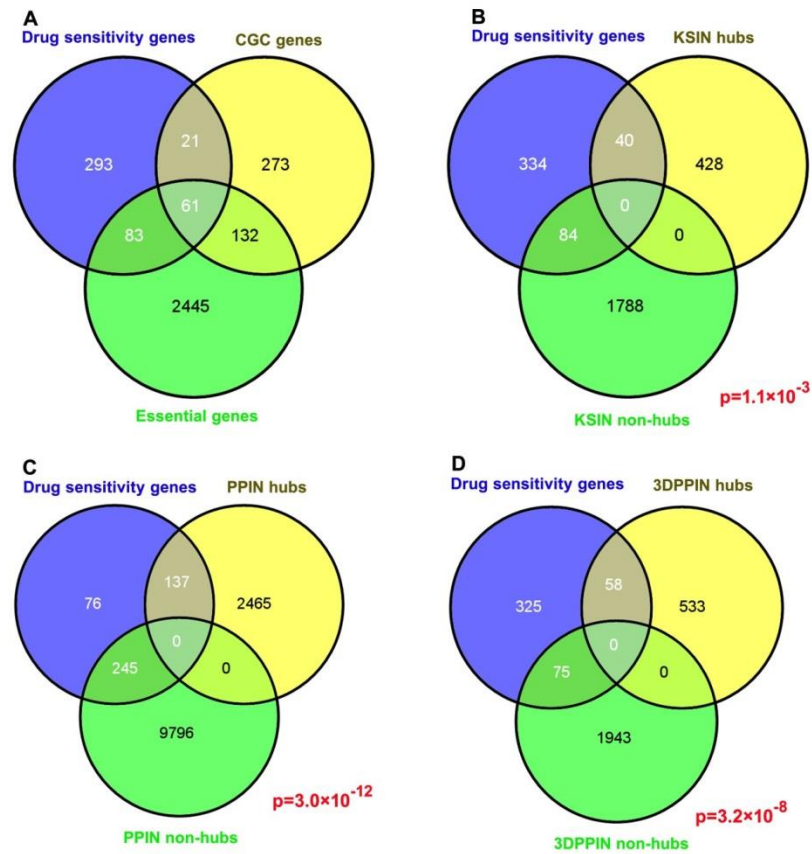

**Figure S4: The Venn diagram of overlaps between hubs versus non-hubs in the protein interactome for drug response genes.** (A) The overlap of drug resistance or sensitivity genes, Cancer Gene Census (CGC) genes, and essential genes. (B) The overlap of drug resistance genes in kinase-substrate interaction network (KSIN) hubs *versus* non-hubs. (C) The overlap of drug resistance genes in protein-protein interaction network (PPIN) hubs *versus* non-hubs. (D) The overlap of drug resistance genes in three-dimensional structural protein-protein interaction network (3DPPIN) hubs *versus* non-hubs.

## REFERENCES

1. Szalay-Beko M, Palotai R, Szappanos B, Kovacs IA, Papp B, Csermely P. ModuLand plug-in for Cytoscape: determination of hierarchical layers of overlapping network modules and community centrality. *Bioinformatics*. 2012; 28: 2202-2204.
2. Kovacs IA, Palotai R, Szalay MS, Csermely P. Community landscapes: an integrative approach to determine overlapping network module hierarchy, identify key nodes and predict network dynamics. *PLoS One*. 2010; 5: e12528.
